# Supplementary material for: Water penetration dynamics through a Janus mesh during drop impact
Source: Royal Society of Chemistry journal article supplement (doi:10.1039/d0sm00567c), 2020-01-01
Supplement: d0sm00567c6.pdf [file d0sm00567c6.pdf]

Supplementary Materials for

**Water penetration dynamics through Janus  
mesh during drop impact**

*ChangwooBae, Seungtae Oh, Jeonghoon Han, Youngsuk Nam\*, Choongyeop Lee\**

Department of Mechanical Engineering, Kyung Hee University, Yongin, Republic of Korea

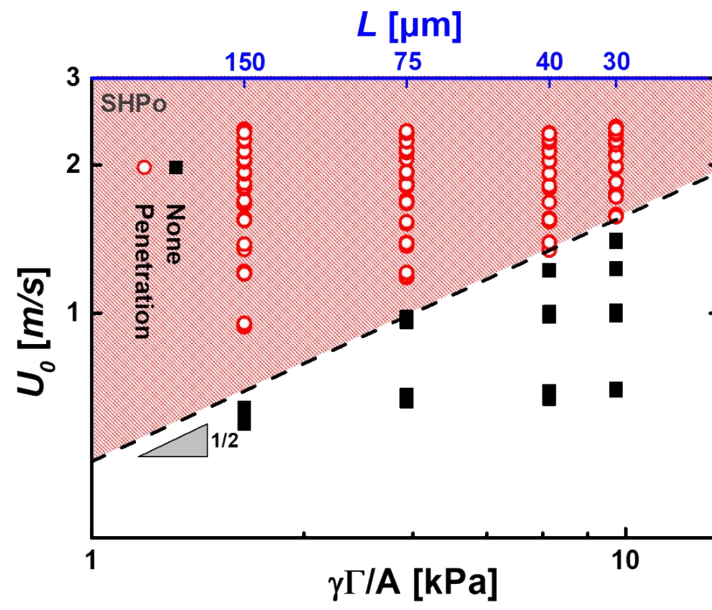

Fig. S1 'Impact Penetration' diagram on SHPo mesh.

## Penetrated volume analysis by MATLAB

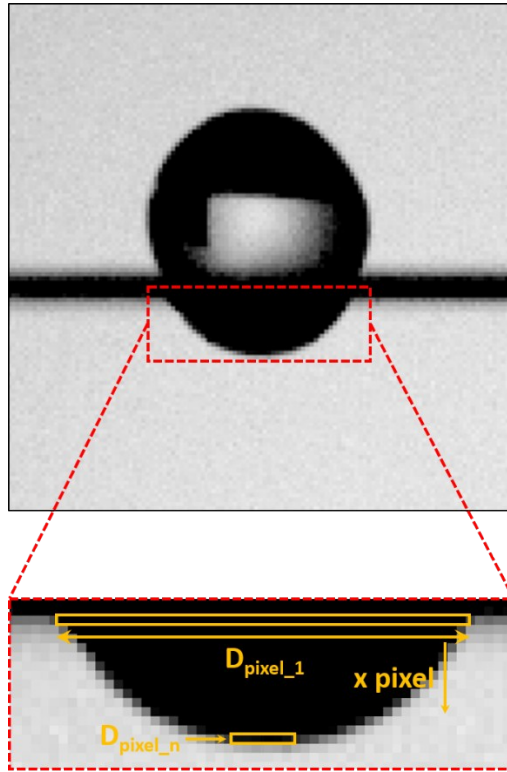

Fig. S2 A representative snapshot image of the penetrated water during capillary pressure-driven water transport for ‘SHPo to SHPi’ impact on #400 mesh.

Fig. S2 is a snapshot image during the imbibition during ‘SHPo to SHPi’ impact. By assuming an axial symmetry of the penetrated volume, one can calculate the penetrated volume from the diameter at  $x$  pixel,  $D_{pixel\_x}$ . The overall penetrated volume at time  $t$  can be determined by the integration of the volume at each pixel such as  $\Omega(t) = c \times \sum_{x=1}^n (\pi D_{pixel\_x}^2 / 4)$ . Here,  $n$  is a pixel number at the nadir of the penetrated shape, and  $c$  is a unit conversion constant (from pixel to meter).
